# Supplementary material for: Alkaline and alkaline earth metal complexes of dianhydride derivatives of clodronate and their hydrolysis products
Source: Royal Society of Chemistry journal article supplement (doi:10.1039/c002403a), 2010-01-01
Supplement: c002403a.pdf [file c002403a.pdf]

## Electronic Supplementary Information

# Alkaline and Alkaline Earth Metal Complexes of Dianhydride Derivatives of Clodronate and Their Hydrolysis Products

Susan Kunnas-Hiltunen, Matti Haukka, Jouko Vepsäläinen, Markku Ahlgrén

### Supplementary Figures

- S1  $^1\text{H}$  NMR spectrum for ligand material  $\text{Na}_2\text{Cl}_2\text{C}[\text{PO}_3(\text{C}(\text{O})\text{CH}_2\text{CH}_3)]_2$  (**Na<sub>2</sub>L2**).
- S2  $^{31}\text{P}$  NMR spectrum for ligand material **Na<sub>2</sub>L2**.
- S3 IR spectrum of **Na<sub>2</sub>L2**.
- S4 IR spectrum of compound  $[\text{Na}_3\{\text{Cl}_2\text{C}(\text{PO}_3)_2\}(\text{H}_2\text{O})_4]_n$  (**1**).
- S5 IR spectrum of compound  $[\text{Ba}\{\text{Cl}_2\text{C}(\text{PO}_2\text{O}(\text{C}(\text{O})\text{Me}))_2\}(\text{H}_2\text{O})_3]_n$  (**2**).
- S6 IR spectrum of compound  $[\text{Sr}_2\{(\text{Cl}_2\text{C}(\text{PO}_3)_2)(\text{H}_2\text{O})_4\} \cdot \text{H}_2\text{O}]_n$  (**3**).
- S7 IR spectrum of compound  $[\text{K}_2\{\text{Cl}_2\text{C}(\text{PO}_2\text{O}(\text{C}(\text{O})\text{C}_6\text{H}_5))_2\}\text{O}]_n$  (**4**).

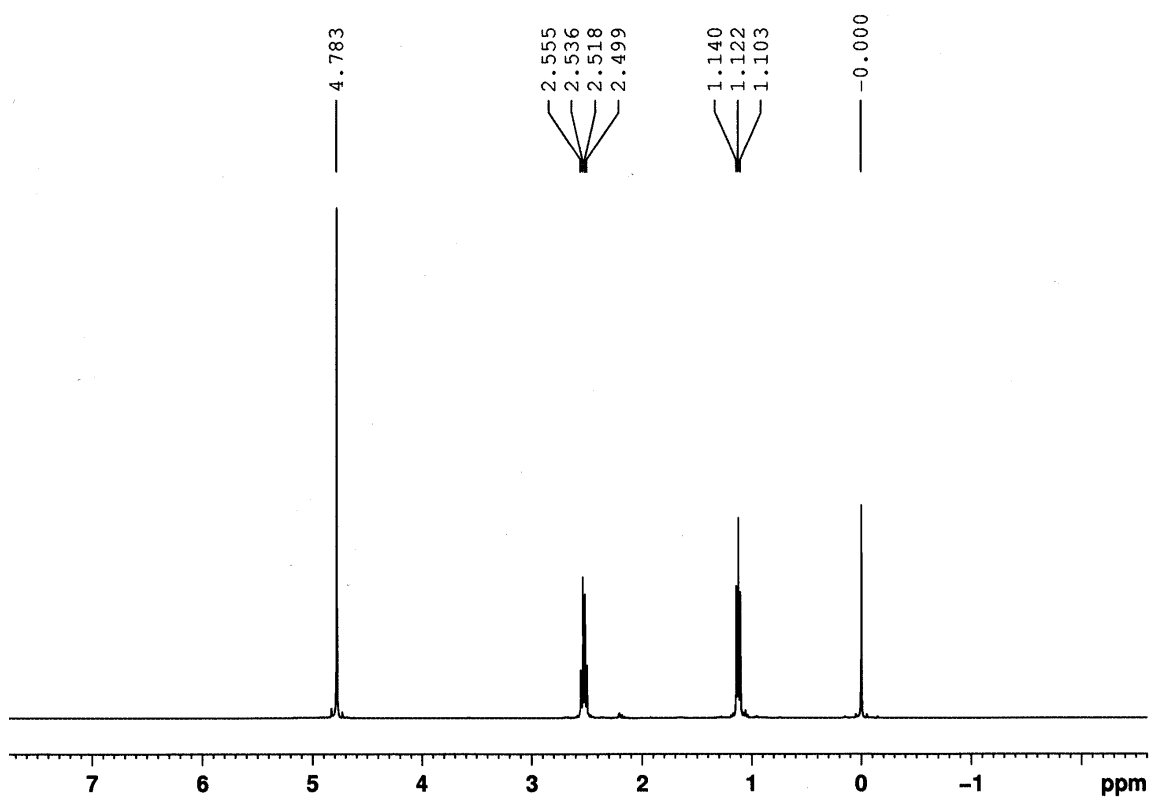

Figure S1.

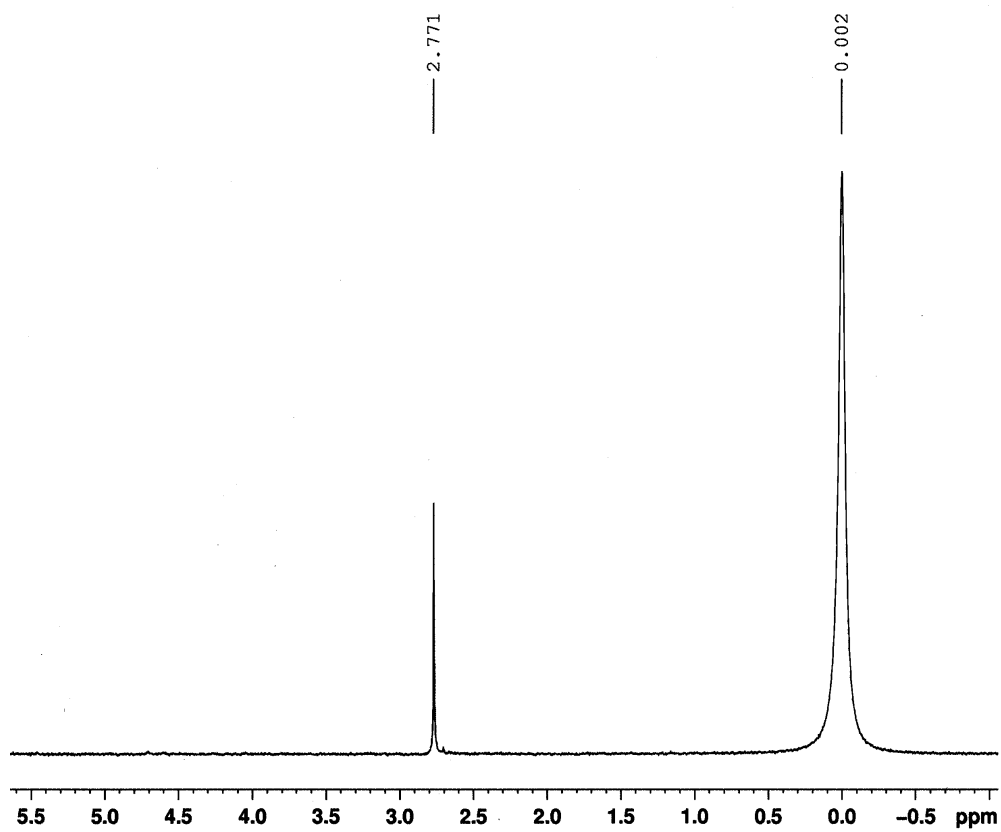

Figure S2.

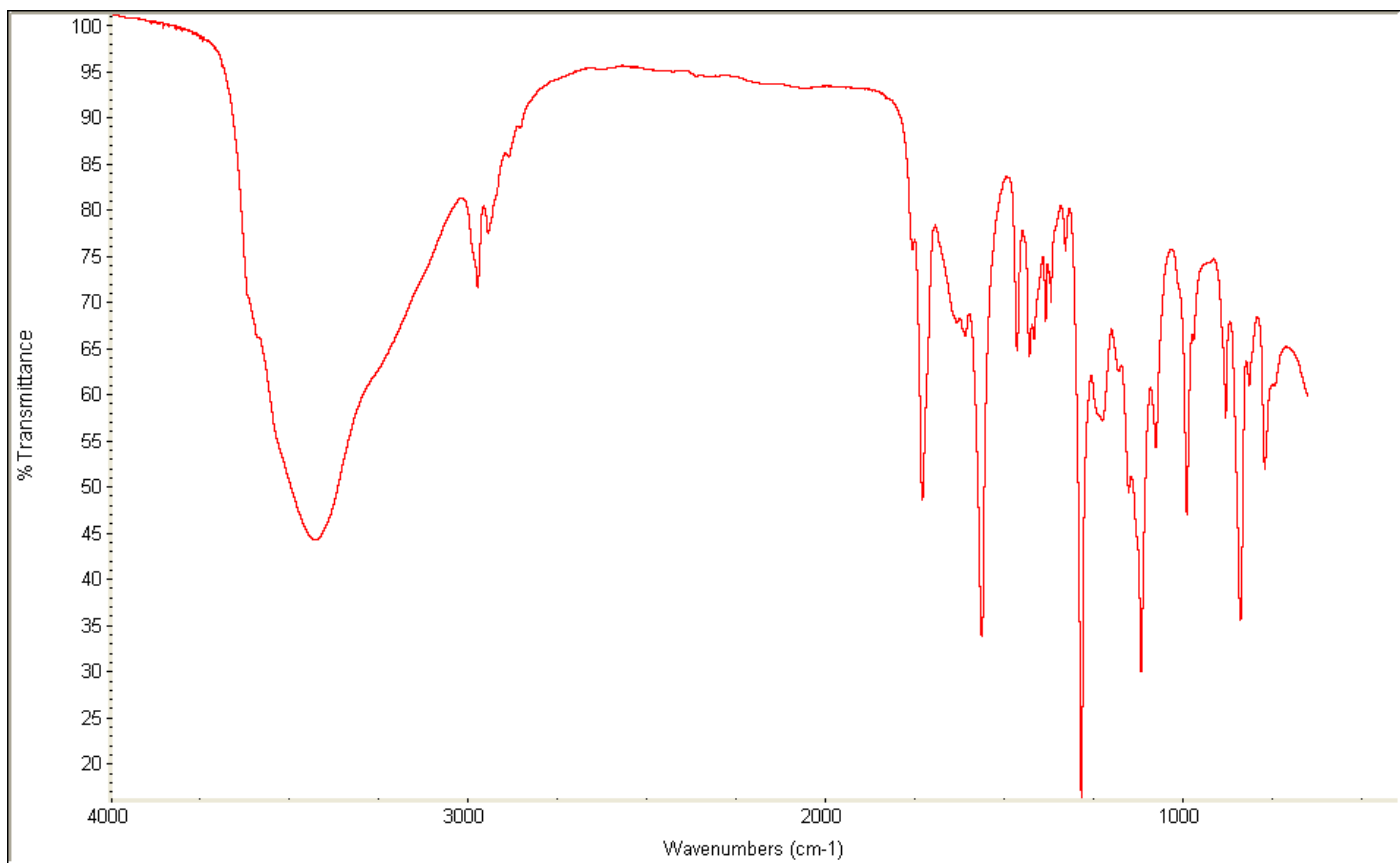

Figure S3.

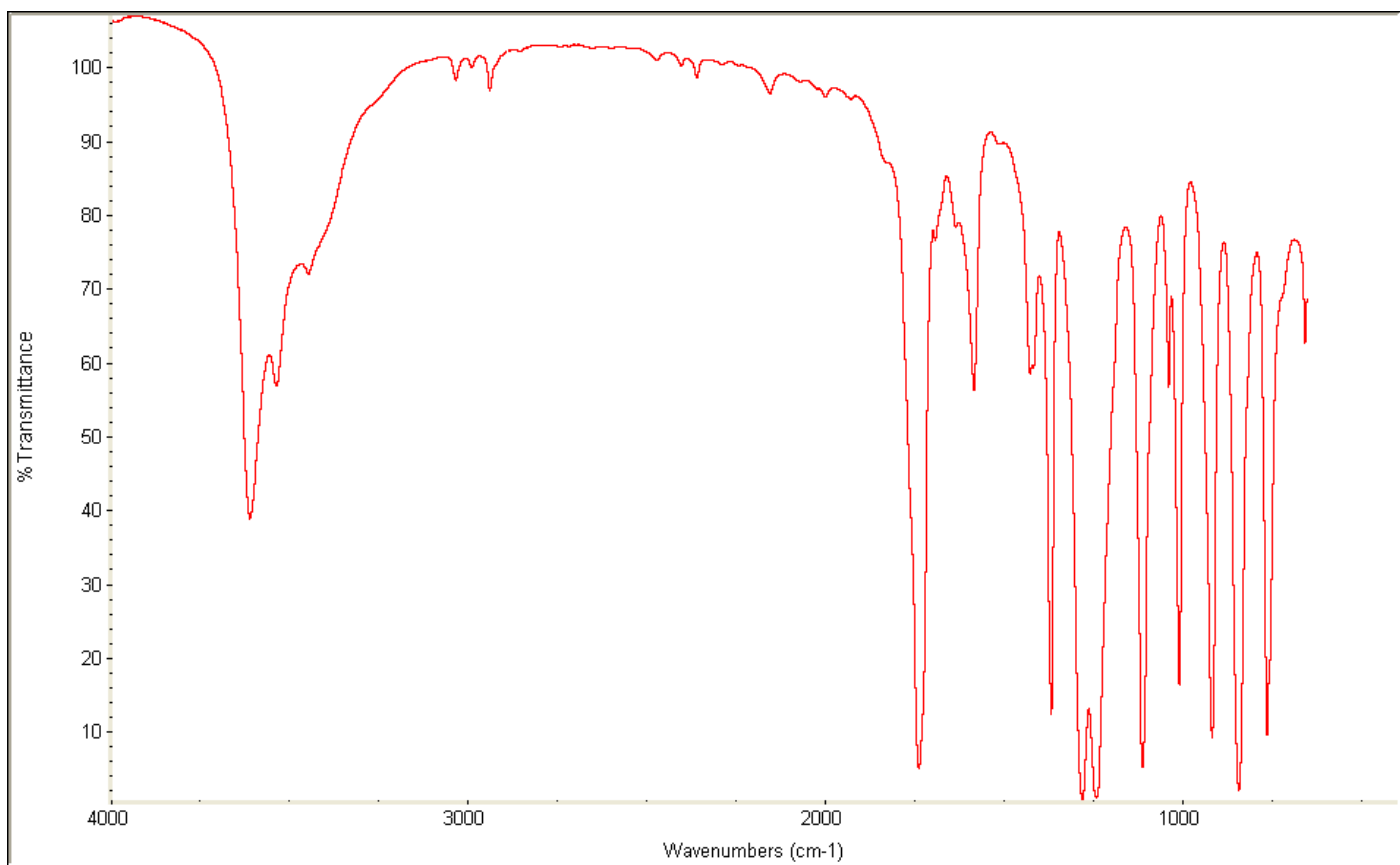

Figure S4.

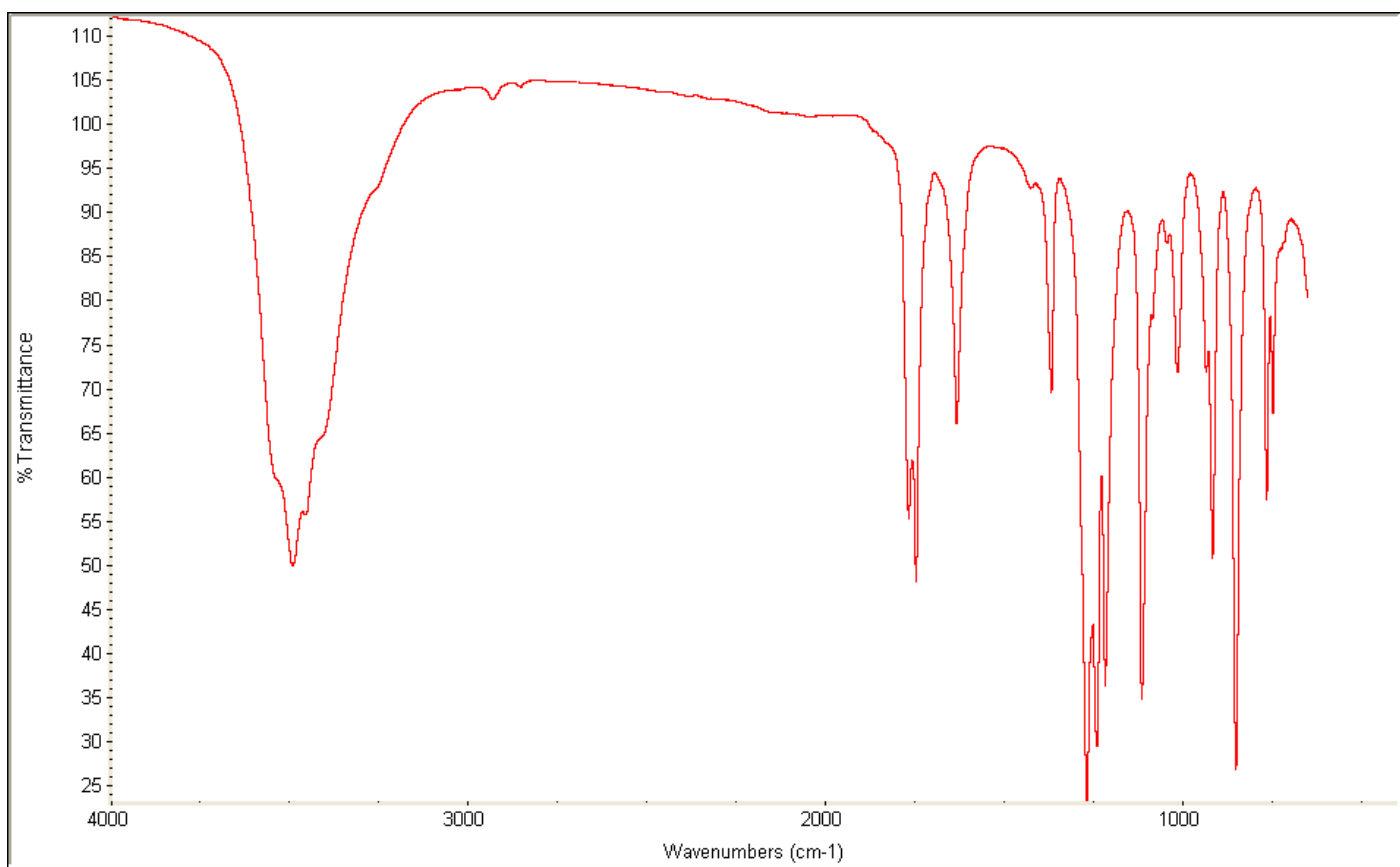

Figure S5.

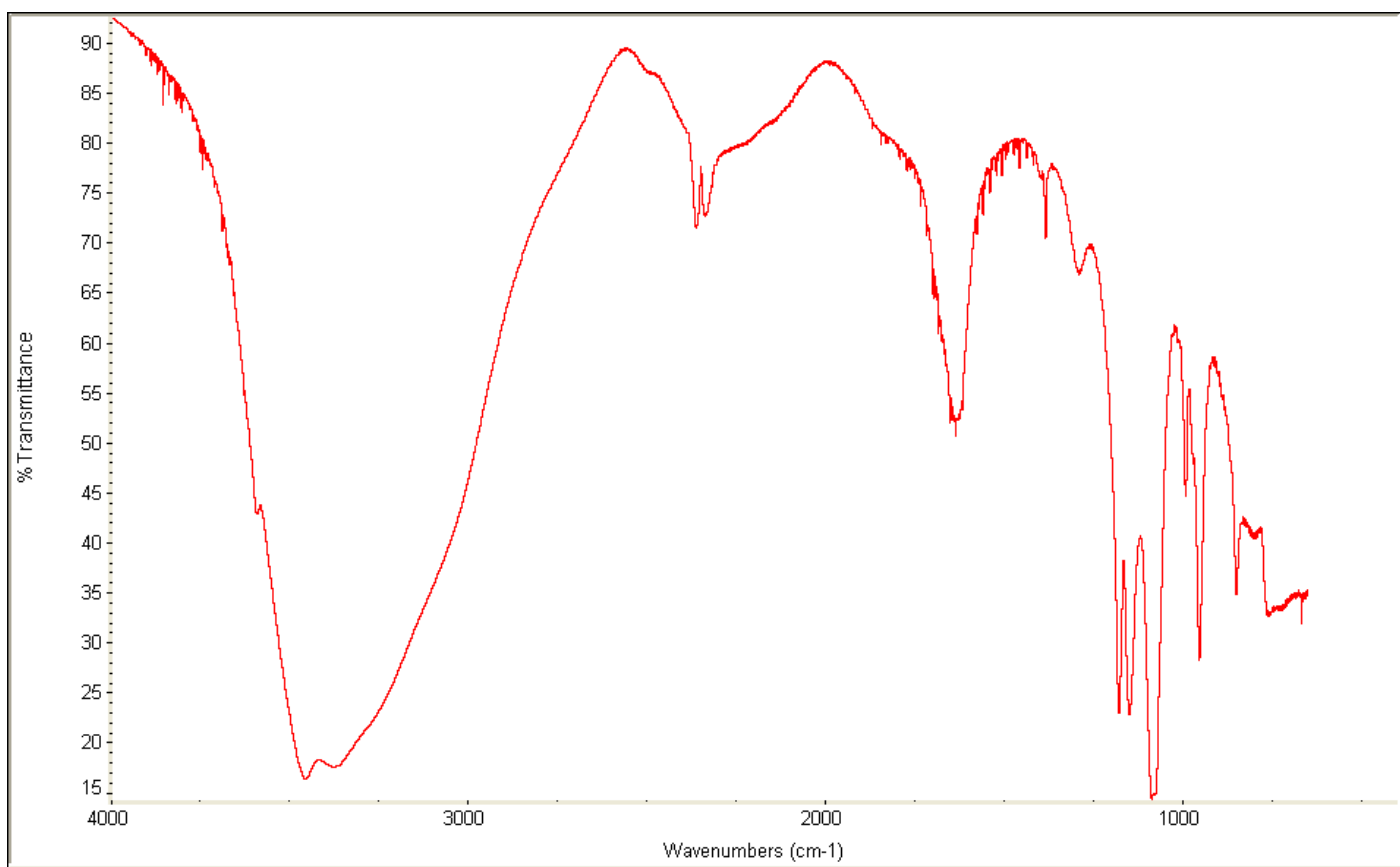

Figure S6.

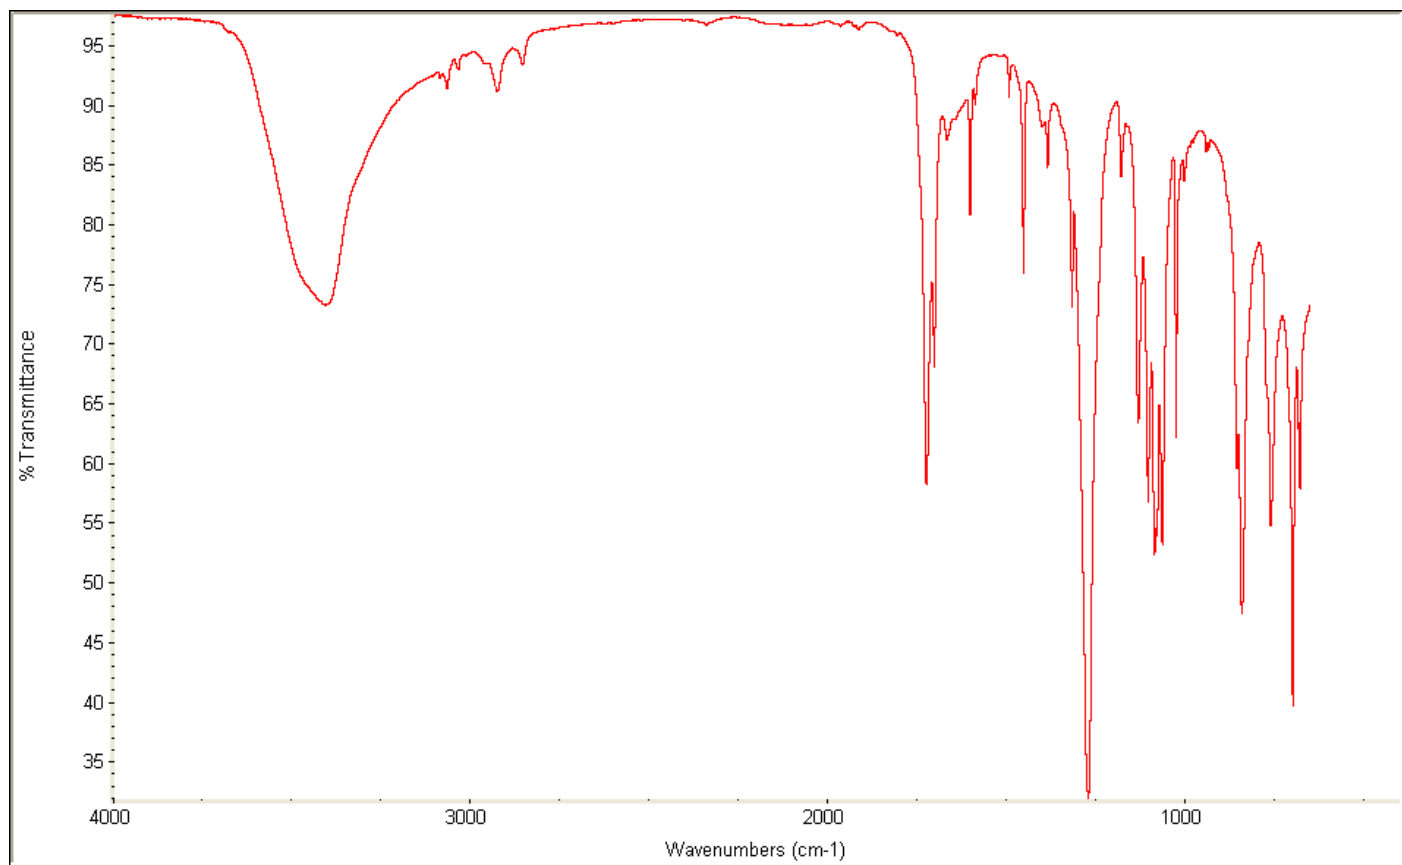

Figure S7.
